# Supplementary material
Source: MDPI journal article supplement (https://www.mdpi.com/2036-7449/16/3/34)
Supplement: s1 [file s1]

| AKI risk factors                                                          |             |       |             |       |                |       |             |       |             |       |                   |       |       |                     |            |             |            |
|---------------------------------------------------------------------------|-------------|-------|-------------|-------|----------------|-------|-------------|-------|-------------|-------|-------------------|-------|-------|---------------------|------------|-------------|------------|
|                                                                           | AKI         |       |             |       | AKI categories |       |             |       |             |       | AKI relative risk |       |       | intragroups p value |            |             |            |
|                                                                           | NO (n=259)  |       | AKI (n=54)  |       | I (n=18)       |       | II (n=27)   |       | III (n=9)   |       | RR                | CI    | 95%   | AKI I (A)           | AKI II (B) | AKI III (C) | NO AKI (D) |
|                                                                           | Frecuencias | %     | Frecuencias | %     | Frecuencias    | %     | Frecuencias | %     | Frecuencias | %     |                   |       |       |                     |            |             |            |
| Sociodemoghrapics                                                         |             |       |             |       |                |       |             |       |             |       |                   |       |       |                     |            |             |            |
| Age, years (Media, SD)                                                    | 59.0        | 14.8  | 65.4        | 14.5  | 62.6           | 13.9  | 66.2        | 15.0  | 69.6        | 13.5  | 2.076             | 1.902 | 2.250 |                     |            |             |            |
| Sex                                                                       |             |       |             |       |                |       |             |       |             |       |                   |       |       |                     |            |             |            |
| Female                                                                    | 108         | 41.7% | 24          | 44.4% | 9              | 50.0% | 12          | 44.4% | 3           | 33.3% |                   |       |       |                     |            |             |            |
| Male                                                                      | 151         | 58.3% | 30          | 55.6% | 9              | 50.0% | 15          | 55.6% | 6           | 66.7% |                   |       |       |                     |            |             |            |
| Ocupation                                                                 |             |       |             |       |                |       |             |       |             |       |                   |       |       |                     |            |             |            |
| Employe                                                                   | 127         | 49.0% | 24          | 44.4% | 8              | 44.4% | 14          | 51.9% | 2           | 22.2% |                   |       |       |                     |            |             |            |
| Home tasks                                                                | 60          | 23.2% | 13          | 24.1% | 5              | 27.8% | 6           | 22.2% | 2           | 22.2% |                   |       |       |                     |            |             |            |
| retired                                                                   | 43          | 16.6% | 8           | 14.8% | 3              | 16.7% | 3           | 11.1% | 2           | 22.2% |                   |       |       |                     |            |             |            |
| Unemploye                                                                 | 29          | 11.2% | 9           | 16.7% | 2              | 11.1% | 4           | 14.8% | 3           | 33.3% |                   |       |       |                     |            |             |            |
| non-pathological history                                                  |             |       |             |       |                |       |             |       |             |       |                   |       |       |                     |            |             |            |
| Days between symptoms and atention (Media, SD)                            | 4.4         | 3.4   | 3.9         | 2.9   | 4.7            | 4.0   | 3.5         | 2.2   | 3.3         | 1.8   |                   |       |       |                     |            |             |            |
| Days between symptoms and hospitalization (Media, SD)                     | 5.7         | 4.0   | 5.4         | 3.6   | 6.5            | 4.9   | 5.0         | 2.8   | 4.7         | 2.0   |                   |       |       |                     |            |             |            |
| First atention as non severe and posterior hospitalization as severe case | 21          | 8.1%  | 6           | 11.1% | 2              | 11.1% | 3           | 11.1% | 1           | 11.1% |                   |       |       |                     |            |             |            |
| Previews contact whit covid case                                          | 49          | 18.9% | 6           | 11.1% | 3              | 16.7% | 3           | 11.1% | 0           | 0.0%  |                   |       |       |                     |            |             |            |
| Vaccination                                                               | 44          | 17.0% | 10          | 18.5% | 3              | 16.7% | 5           | 18.5% | 2           | 22.2% |                   |       |       |                     |            |             |            |
| Comorbidities                                                             |             |       |             |       |                |       |             |       |             |       |                   |       |       |                     |            |             |            |
| Pulmonary obstructive chronic disease                                     | 15          | 5.8%  | 7           | 13.0% | 3              | 16.7% | 4           | 14.8% | 0           | 0.0%  |                   |       |       |                     |            |             |            |
| Diabetes                                                                  | 87          | 33.6% | 18          | 33.3% | 7              | 38.9% | 8           | 29.6% | 3           | 33.3% |                   |       |       |                     |            |             |            |
| Hypertension                                                              | 109         | 42.1% | 32          | 59.3% | 13             | 72.2% | 14          | 51.9% | 5           | 55.6% | 1.128             | 1.014 | 1.254 |                     |            |             |            |
| Cardiovascular disease                                                    | 13          | 5.0%  | 4           | 7.4%  | 2              | 11.1% | 2           | 7.4%  | 0           | 0.0%  |                   |       |       |                     |            |             |            |
| Ashtma                                                                    | 3           | 1.2%  | 2           | 3.7%  | 0              | 0.0%  | 1           | 3.7%  | 1           | 11.1% |                   |       |       |                     |            |             | D(0.046)   |
| Immune depression                                                         | 5           | 1.9%  | 3           | 5.6%  | 1              | 5.6%  | 2           | 7.4%  | 0           | 0.0%  |                   |       |       |                     |            |             |            |
| Smoking                                                                   | 25          | 9.7%  | 5           | 9.3%  | 2              | 11.1% | 3           | 11.1% | 0           | 0.0%  |                   |       |       |                     |            |             |            |
| Obesity                                                                   | 53          | 20.5% | 12          | 22.2% | 1              | 5.6%  | 10          | 37.0% | 1           | 11.1% |                   |       |       |                     |            |             |            |
| HIV                                                                       | 1           | 0.4%  | 0           | 0.0%  | 0              | 0.0%  | 0           | 0.0%  | 0           | 0.0%  |                   |       |       |                     |            |             |            |
| Other comorbidities                                                       | 29          | 11.2% | 3           | 5.6%  | 2              | 11.1% | 0           | 0.0%  | 1           | 11.1% |                   |       |       |                     |            |             |            |
| Sintomatology                                                             |             |       |             |       |                |       |             |       |             |       |                   |       |       |                     |            |             |            |
| Suden disease                                                             | 65          | 25.1% | 16          | 29.6% | 7              | 38.9% | 7           | 25.9% | 2           | 22.2% |                   |       |       |                     |            |             |            |
| Fever                                                                     | 158         | 61.0% | 35          | 64.8% | 10             | 55.6% | 18          | 66.7% | 7           | 77.8% |                   |       |       |                     |            |             |            |
| Cofing                                                                    | 196         | 75.7% | 39          | 72.2% | 11             | 61.1% | 20          | 74.1% | 8           | 88.9% |                   |       |       |                     |            |             |            |
| Head ache                                                                 | 163         | 62.9% | 33          | 61.1% | 8              | 44.4% | 19          | 70.4% | 6           | 66.7% |                   |       |       |                     |            |             |            |
| Odynophagia                                                               | 95          | 36.7% | 17          | 31.5% | 6              | 33.3% | 8           | 29.6% | 3           | 33.3% |                   |       |       |                     |            |             |            |
| poor general condition                                                    | 124         | 47.9% | 26          | 48.1% | 6              | 33.3% | 15          | 55.6% | 5           | 55.6% |                   |       |       |                     |            |             |            |
| Myalgia                                                                   | 160         | 61.8% | 34          | 63.0% | 13             | 72.2% | 17          | 63.0% | 4           | 44.4% |                   |       |       |                     |            |             |            |
| Arthralgies                                                               | 151         | 58.3% | 32          | 59.3% | 12             | 66.7% | 16          | 59.3% | 4           | 44.4% |                   |       |       |                     |            |             |            |
| Prostration                                                               | 7           | 2.7%  | 5           | 9.3%  | 1              | 5.6%  | 3           | 11.1% | 1           | 11.1% |                   |       |       |                     |            |             |            |
| Rhinorrhea                                                                | 43          | 16.6% | 6           | 11.1% | 3              | 16.7% | 2           | 7.4%  | 1           | 11.1% |                   |       |       |                     |            |             |            |
| Chill                                                                     | 113         | 43.6% | 20          | 37.0% | 8              | 44.4% | 10          | 37.0% | 2           | 22.2% |                   |       |       |                     |            |             |            |
| Abdominal pain                                                            | 36          | 13.9% | 5           | 9.3%  | 3              | 16.7% | 1           | 3.7%  | 1           | 11.1% |                   |       |       |                     |            |             |            |
| Conjunctivitis                                                            | 14          | 5.4%  | 2           | 3.7%  | 1              | 5.6%  | 1           | 3.7%  | 0           | 0.0%  |                   |       |       |                     |            |             |            |
| Dyspnoea                                                                  | 193         | 74.5% | 40          | 74.1% | 13             | 72.2% | 20          | 74.1% | 7           | 77.8% |                   |       |       |                     |            |             |            |
| Cyanosis                                                                  | 12          | 4.6%  | 5           | 9.3%  | 3              | 16.7% | 2           | 7.4%  | 0           | 0.0%  |                   |       |       |                     |            |             |            |
| Diarrhea                                                                  | 44          | 17.0% | 10          | 18.5% | 3              | 16.7% | 5           | 18.5% | 2           | 22.2% |                   |       |       |                     |            |             |            |
| Chest_pain                                                                | 98          | 37.8% | 19          | 35.2% | 7              | 38.9% | 8           | 29.6% | 4           | 44.4% |                   |       |       |                     |            |             |            |
| Polypnea                                                                  | 12          | 4.6%  | 5           | 9.3%  | 3              | 16.7% | 2           | 7.4%  | 0           | 0.0%  |                   |       |       |                     |            |             |            |
| Coryzza                                                                   | 2           | 0.8%  | 2           | 3.7%  | 1              | 5.6%  | 0           | 0.0%  | 1           | 11.1% |                   |       |       |                     |            |             | D(0.011)   |
| Anosmia                                                                   | 39          | 15.1% | 8           | 14.8% | 4              | 22.2% | 3           | 11.1% | 1           | 11.1% |                   |       |       |                     |            |             |            |
| Dysgeusia                                                                 | 39          | 15.1% | 7           | 13.0% | 2              | 11.1% | 3           | 11.1% | 2           | 22.2% |                   |       |       |                     |            |             |            |
| Dehydration                                                               | 19          | 7.3%  | 7           | 13.0% | 3              | 16.7% | 3           | 11.1% | 1           | 11.1% |                   |       |       |                     |            |             |            |

|                                                            |       |       |       |       |       |       |       |       |       |        |                   |
|------------------------------------------------------------|-------|-------|-------|-------|-------|-------|-------|-------|-------|--------|-------------------|
| <b>Therapeutic indication of drugs with renal activity</b> |       |       |       |       |       |       |       |       |       |        |                   |
| angiotensin-converting-enzyme (ACE)                        | 19    | 7.3%  | 7     | 13.0% | 4     | 22.2% | 2     | 7.4%  | 1     | 11.1%  |                   |
| Estatins                                                   | 6     | 2.3%  | 0     | 0.0%  | 0     | 0.0%  | 0     | 0.0%  | 0     | 0.0%   | 0.824 0.783 0.868 |
| inhibitors and/or angiotensin-receptor blockers (ARAs),    | 92    | 35.5% | 25    | 46.3% | 10    | 55.6% | 10    | 37.0% | 5     | 55.6%  |                   |
| nonsteroidal anti-inflammatory drugs (AINEs)               | 32    | 12.4% | 7     | 13.0% | 1     | 5.6%  | 4     | 14.8% | 2     | 22.2%  |                   |
| <b>Laboratories</b>                                        |       |       |       |       |       |       |       |       |       |        |                   |
| Leukocytes 103 C ls/mL (Media, SD)                         | 10.7  | 5.3   | 12.4  | 4.8   | 11.9  | 4.8   | 12.8  | 4.7   | 12.0  | 5.7    |                   |
| Creatinine mmol/l (Media, SD)                              | 0.8   | 0.2   | 2.7   | 2.2   | 1.6   | 0.1   | 2.3   | 0.5   | 6.0   | 4.0    | 3.076 1.902 3.250 |
| Urea mmol/l (Media, SD)                                    | 24.0  | 15.6  | 37.3  | 25.7  | 31.7  | 13.5  | 32.7  | 20.8  | 62.3  | 41.6   |                   |
| Hemoglobin g/dl (Media, SD)                                | 14.6  | 2.2   | 14.0  | 2.4   | 14.0  | 2.7   | 14.4  | 2.2   | 12.8  | 2.2    | 0.018 0.000 0.037 |
| C-reactive protein mg/dl (Media, SD)                       | 135.2 | 107.0 | 186.2 | 122.6 | 186.9 | 126.3 | 176.9 | 126.4 | 212.9 | 112.9  |                   |
| <b>Clinical severity</b>                                   |       |       |       |       |       |       |       |       |       |        |                   |
| Endotracheal intubation                                    | 37    | 14.3% | 27    | 50.0% | 5     | 27.8% | 16    | 59.3% | 6     | 66.7%  | 1.542 1.245 1.910 |
| X-ray pneumonia                                            | 19    | 7.3%  | 23    | 42.6% | 4     | 22.2% | 13    | 48.1% | 6     | 66.7%  | 1.958 1.400 2.738 |
| Days stay                                                  | 8.6   | 7.8   | 12.2  | 8.9   | 12.3  | 10.4  | 12.7  | 9.0   | 10.9  | 6.0    |                   |
| Flu like disease                                           | 66    | 25.5% | 14    | 25.9% | 5     | 27.8% | 7     | 25.9% | 2     | 22.2%  |                   |
| Severe respiratory disease                                 | 193   | 74.5% | 40    | 74.1% | 13    | 72.2% | 20    | 74.1% | 7     | 77.8%  |                   |
| Decease                                                    | 103   | 39.8% | 40    | 74.1% | 6     | 33.3% | 25    | 92.6% | 9     | 100.0% | 4.327 2.242 8.352 |
| Clinical improvement                                       | 156   | 60.2% | 14    | 25.9% | 12    | 66.7% | 2     | 7.4%  | 0     | 0.0%   |                   |

SD; Standard deviation. Statistical parameters: Relative Risk CI 95% Followed cohort. For P values intragroups was used Kruskal Wallis method, whit bonferronis adjustment. For numeric variables Linear regretion where calculated
